# Supplementary material for: Protein aggregates nucleate ice: the example of apoferritin
Source: Copernicus journal article supplement (doi:10.5194/acp-20-3291-2020), 2020-03-20
Supplement: Supplementary file 1 [file acp-20-3291-2020-supplement.pdf]

Supplement of Atmos. Chem. Phys., 20, 3291–3315, 2020  
<https://doi.org/10.5194/acp-20-3291-2020-supplement>  
© Author(s) 2020. This work is distributed under  
the Creative Commons Attribution 4.0 License.

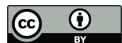

*Supplement of*

## **Protein aggregates nucleate ice: the example of apoferritin**

**María Cascajo-Castresana et al.**

*Correspondence to:* Claudia Marcolli ([claudia.marcolli@env.ethz.ch](mailto:claudia.marcolli@env.ethz.ch))

The copyright of individual parts of the supplement might differ from the CC BY 4.0 License.

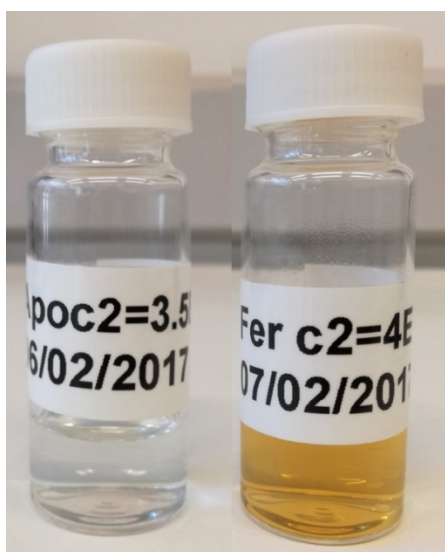

**Figure S1.** Color of ferritin (right vial) compared with colorless apoferritin (left vial).

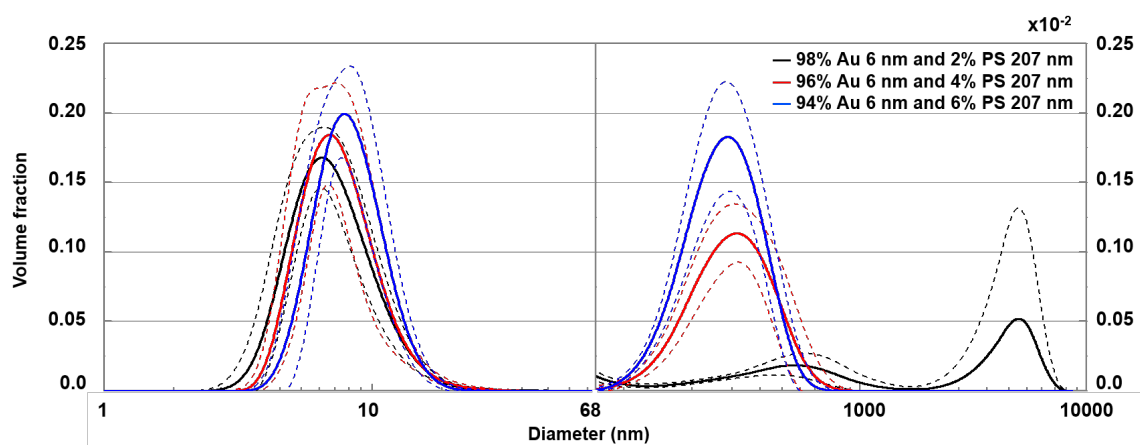

**Figure S2.** Volume-weighted distribution of polystyrene latex and gold nanoparticles mixtures measured by dynamic light scattering. (a) Main peak corresponds to the 6 nm gold signal. (b) Secondary peak corresponds to the polystyrene signal (207 nm). Mixing ratios gold/polystyrene: 98/2 (black), 96/4 (green), 94/6 (pink). Solid lines are averages of multiple measurements; dashed lines indicate one standard deviation.

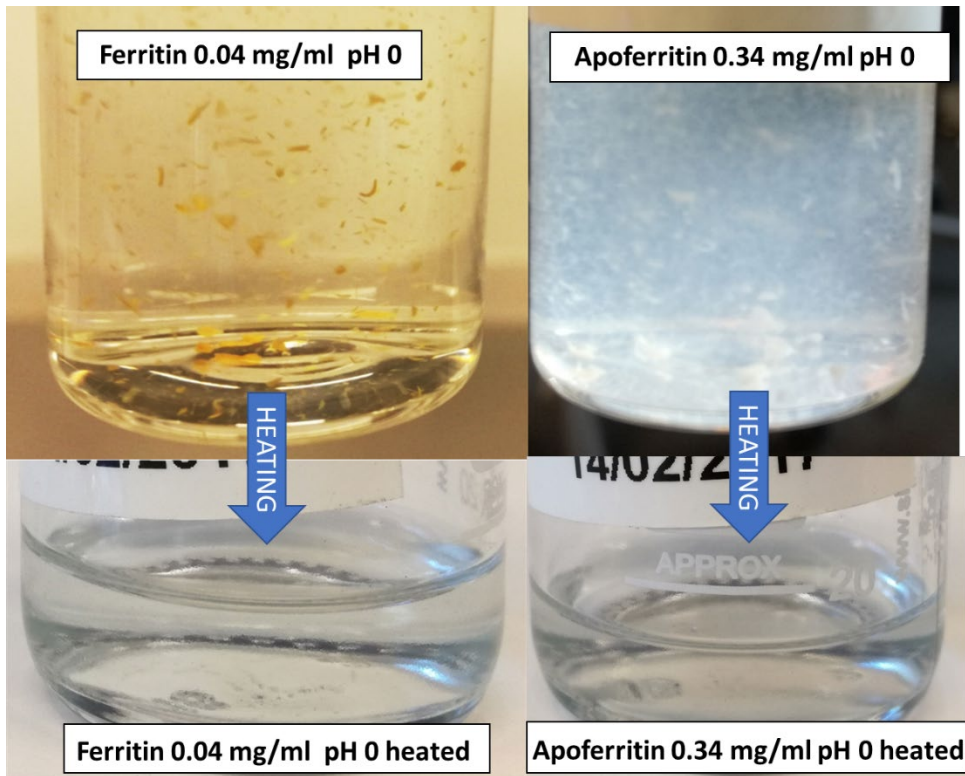

**Figure S3.** Effect of pH 0 and pH 0 combined with heating to 110°C on the appearance of ferritin and apoferritin solutions.

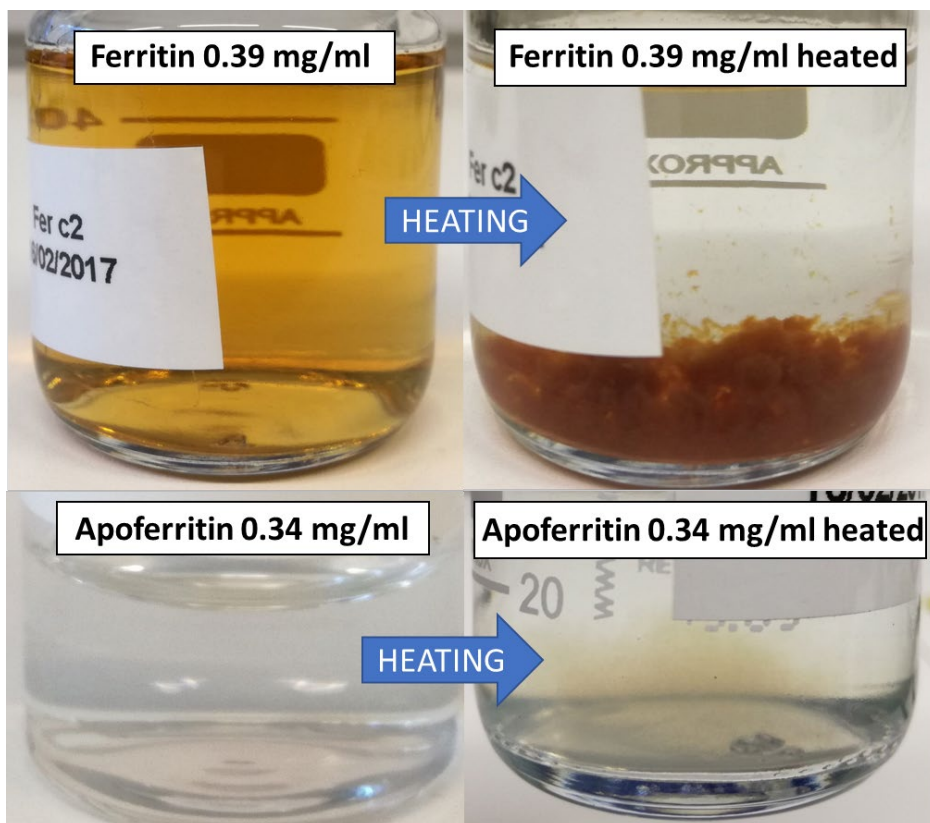

**Figure S4.** Effect of heating to 110°C on the appearance of ferritin and apoferritin solutions.

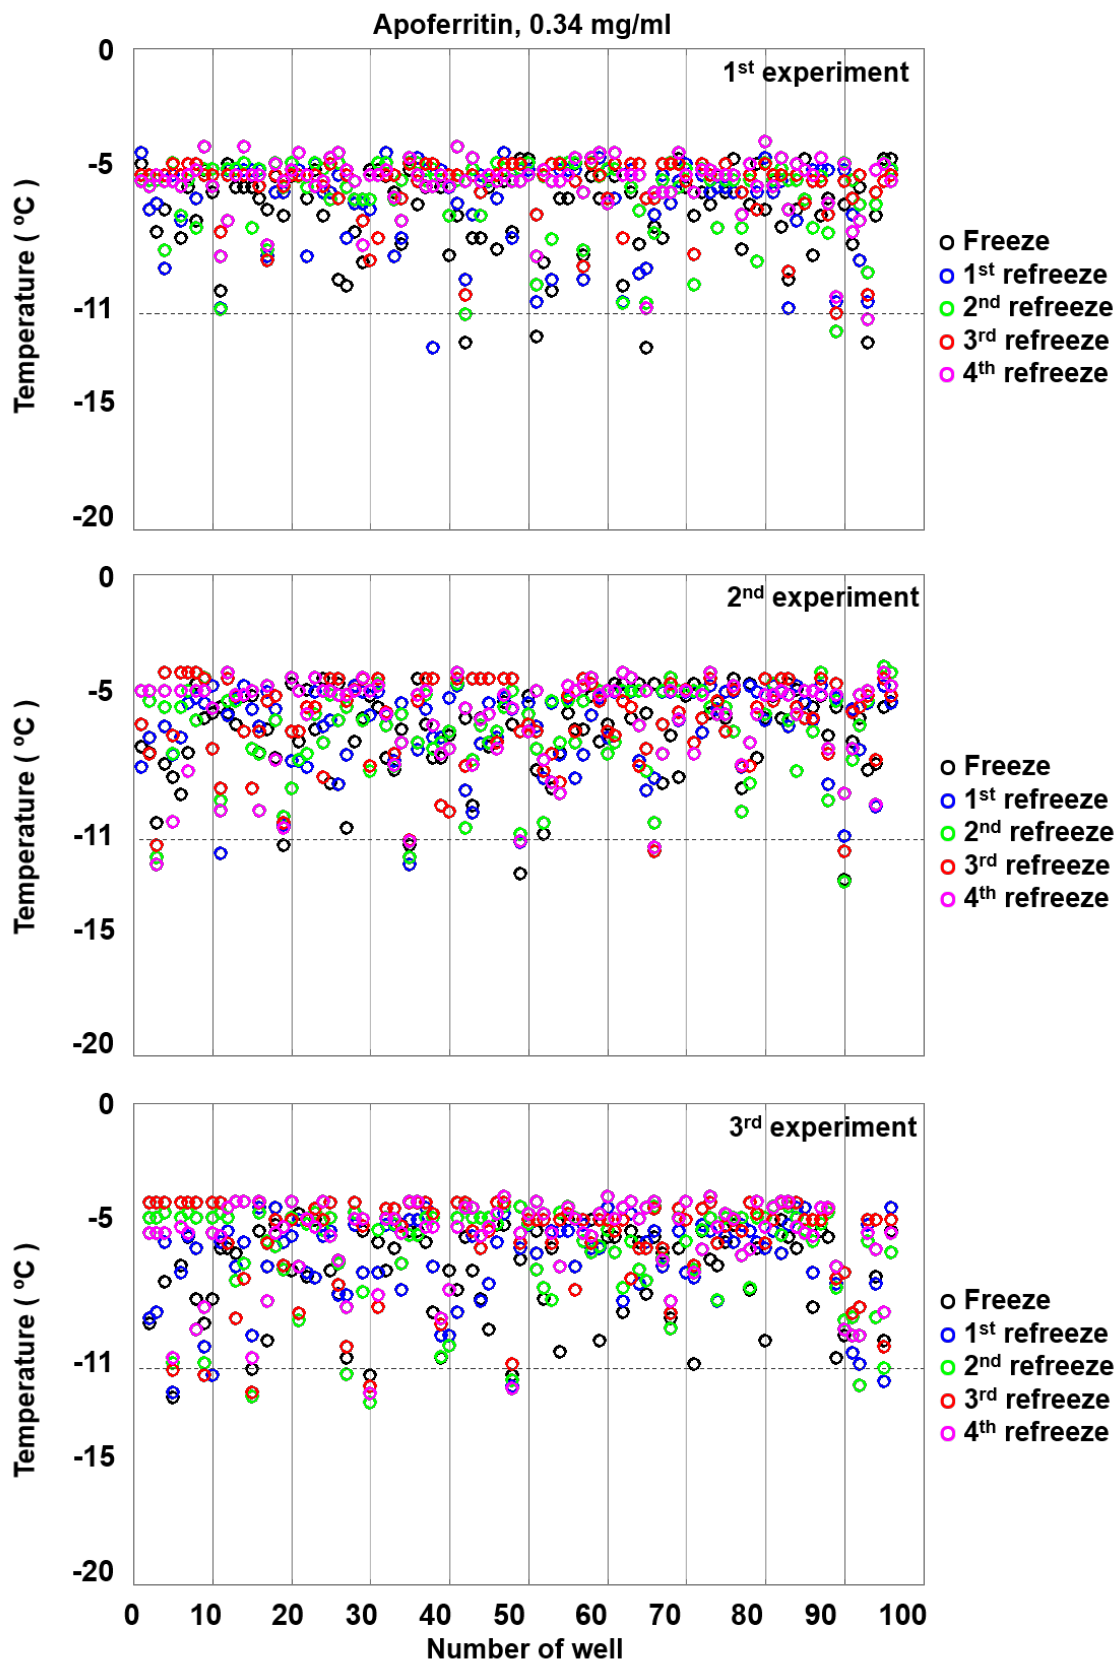

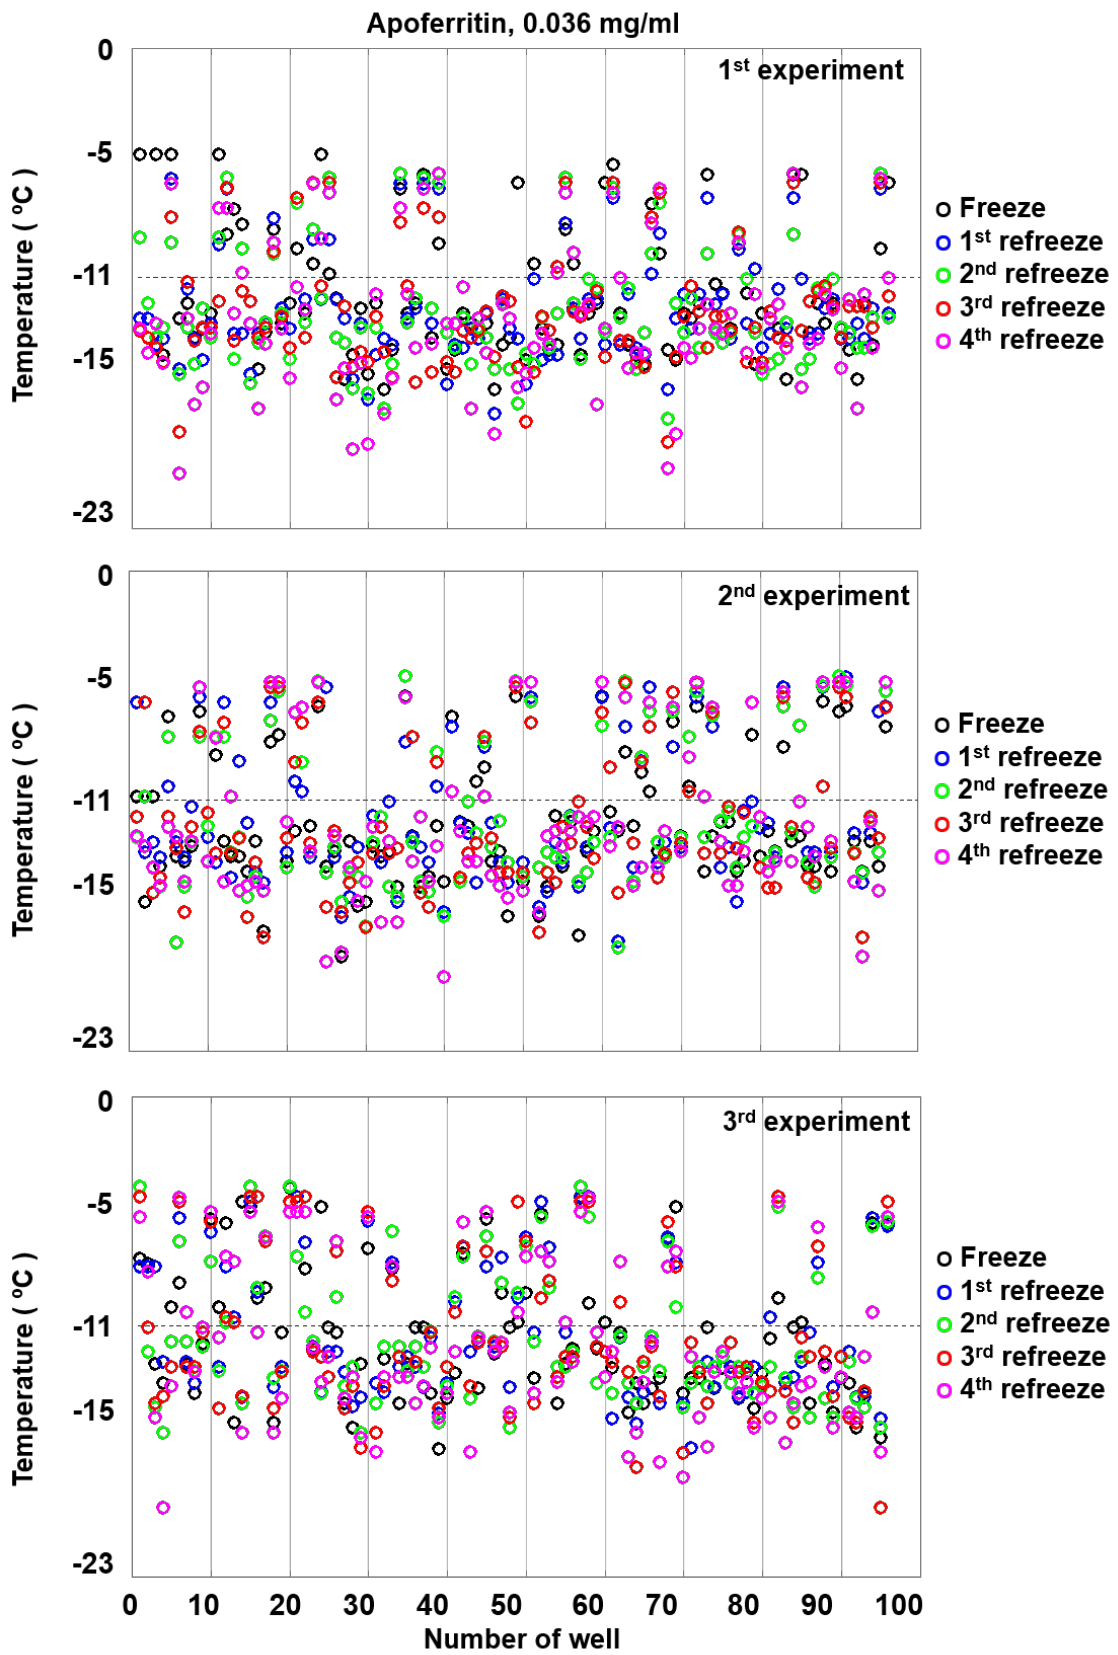

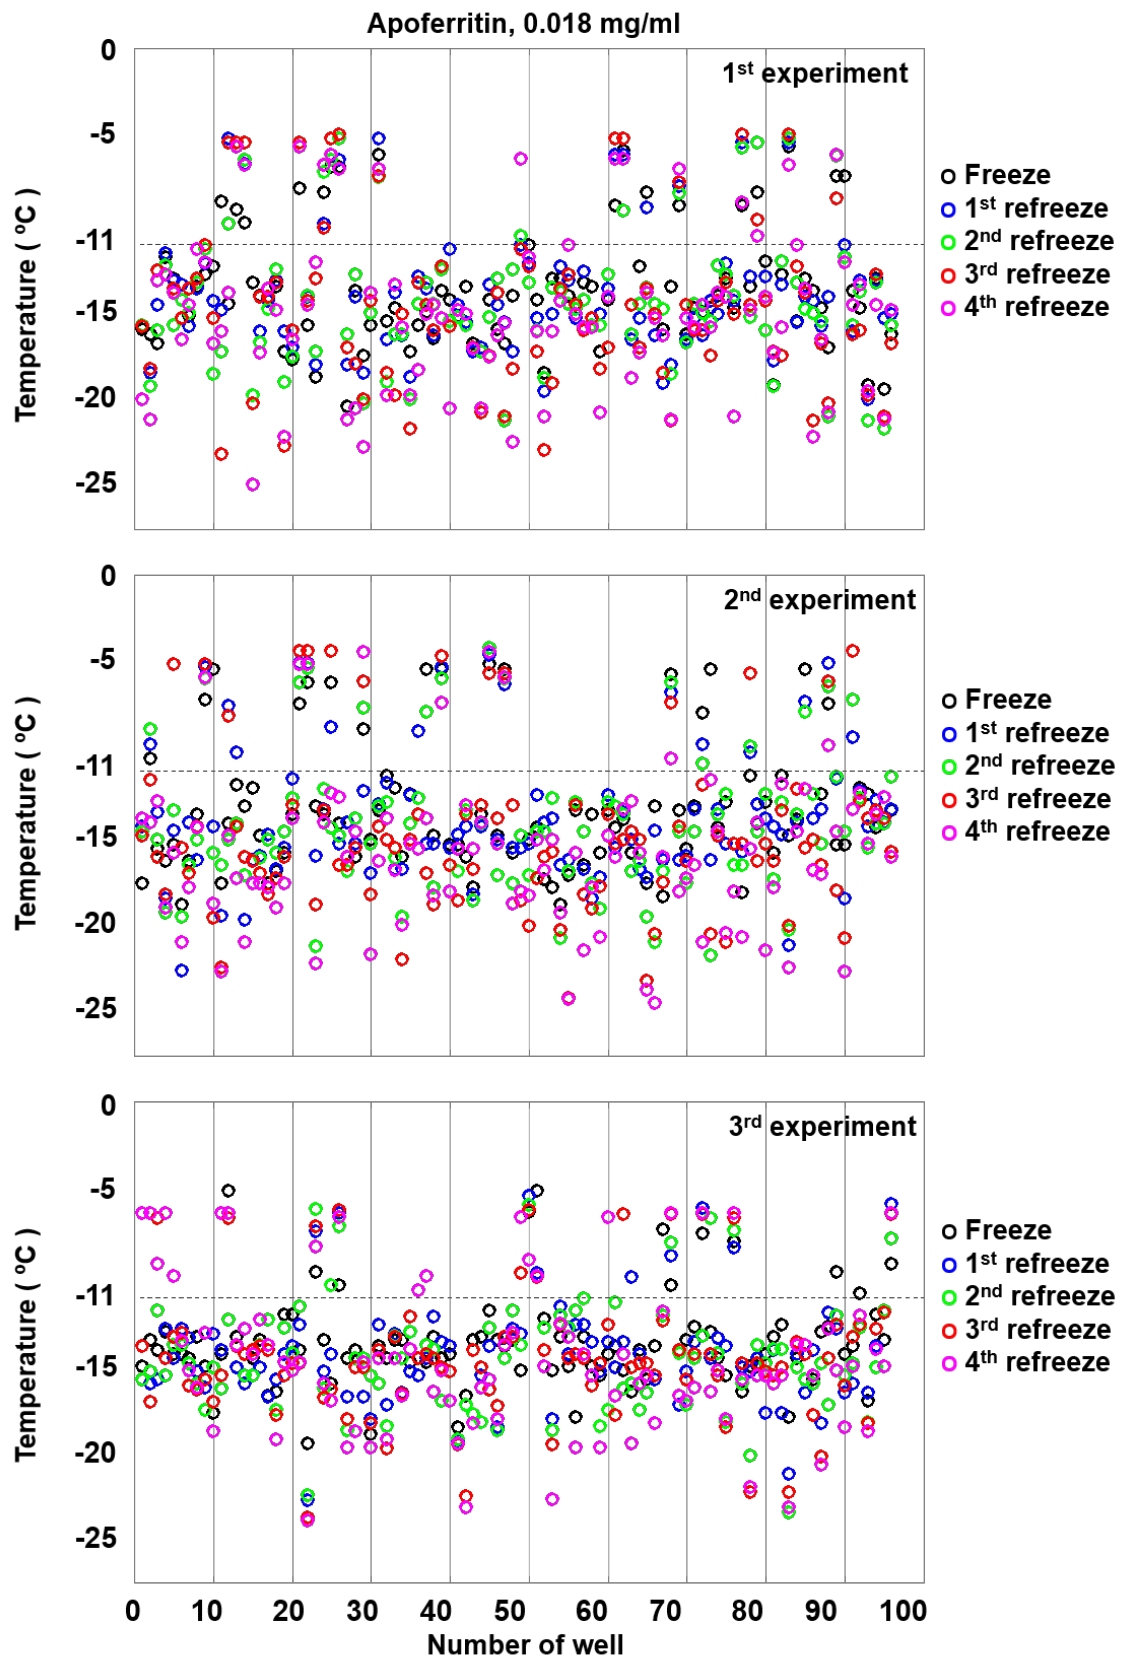

**Figure S5.** Well per well results of refreeze experiments performed with apoferritin (batch 2) with concentrations of 0.34 mg/ml, 0.036 mg/ml and 0.018 mg/ml.
